# Supplementary material for: The Mitochondrial Genome of the Legume Vigna radiata and the Analysis of Recombination across Short Mitochondrial Repeats
Source: PubMed Central journal article supplement (PMC3024419; doi:10.1371/journal.pone.0016404), 2011-01-20

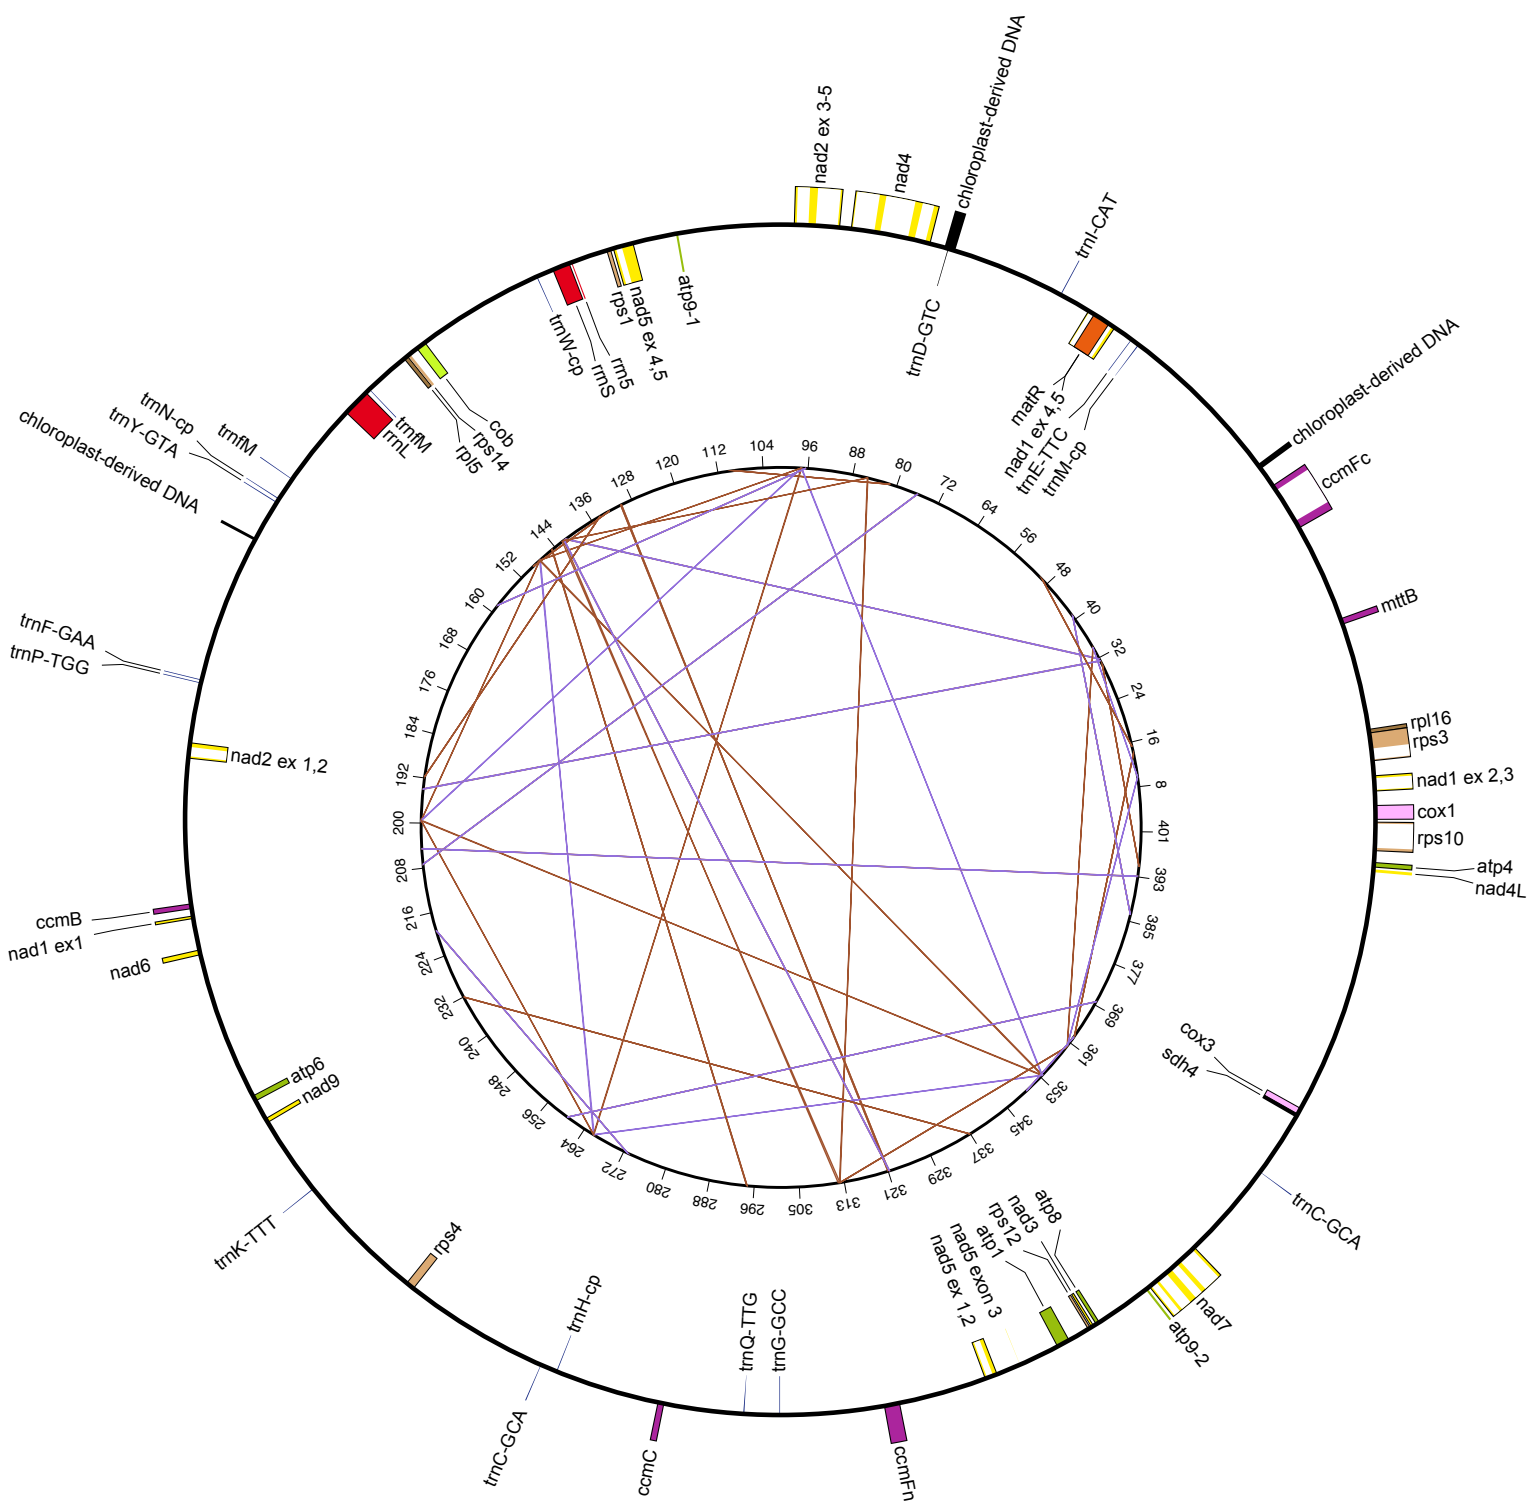

Supplement: pone.0016404.s001.pdf [file pone.0016404.s001.pdf]
