# Supplementary material for: The Mitochondrial Genome of the Legume Vigna radiata and the Analysis of Recombination across Short Mitochondrial Repeats
Source: PubMed Central journal article supplement (PMC3024419; doi:10.1371/journal.pone.0016404), 2011-01-20
Supplement: pone.0016404.s006.pdf [file pone.0016404.s006.pdf]

**Table S3.** Primers used for PCR recombination experiments.

| Species          | Primer name <sup>1</sup> | Start coordinate | End coordinate | Direction | Sequence                |
|------------------|--------------------------|------------------|----------------|-----------|-------------------------|
| <i>Vigna</i>     | 55_vigna_recomb+         | 244484           | 244505         | forward   | TTAGCTCTGCAGATGAAGCAAG  |
|                  | 55_vigna_recomb-         | 245097           | 245118         | reverse   | AGAAGATCGAGCTTGTGGAAAG  |
|                  | 55_vigna_templ+          | 244458           | 244479         | forward   | ATTGGCTAGAGCAGTCACTTCC  |
|                  | 55_vigna_templ-          | 245201           | 245222         | reverse   | CCCTCCAAGTTGTTTCAAAGTC  |
| <i>Cucurbita</i> | 55_zuc_recomb+           | 80666            | 80687          | forward   | CCTGACCTGCCCTTATTGTTAG  |
|                  | 55_zuc_recomb-           | 80920            | 80941          | reverse   | GAAATTGTTTCGTTACCCTCTC  |
|                  | 55_zuc_templ+            | 80280            | 80301          | forward   | ACCCCAATCAATAGAACACAC   |
|                  | 55_zuc_templ-            | 81233            | 81254          | reverse   | TCTGACTGTACCGCTTTTCAGA  |
| <i>Vigna</i>     | 90_vigna_recomb+         | 126968           | 126989         | forward   | CTGGTGTTGGATCACCTACTCA  |
|                  | 90_vigna_recomb-         | 127505           | 127526         | reverse   | GCTTCAAAGATGCTGCTTACCT  |
|                  | 90_vigna_templ+          | 126852           | 126873         | forward   | TTTGGTGGCAGGTCTTTCTATT  |
|                  | 90_vigna_templ-          | 127727           | 127748         | reverse   | AGAATGGCATAGCGATCAAACCT |
| <i>Cucurbita</i> | 90_zuc_recomb+           | 966956           | 966977         | forward   | GCGCAGCTTGGTAGTTTAGTTT  |
|                  | 90_zuc_recomb-           | 967468           | 967489         | reverse   | CAATGGAATTGTGTGTGAGACC  |
|                  | 90_zuc_templ+            | 966709           | 966730         | forward   | GAAGAGGGGACTGCTAAATGTG  |
|                  | 90_zuc_templ-            | 967587           | 967608         | reverse   | ATGCAGGCAGTATTCAGAACCT  |
| <i>Vigna</i>     | 148_vigna_recomb+        | 122954           | 122975         | forward   | TGCTTGGTCTCCCTTTATTTTC  |
|                  | 148_vigna_recomb-        | 123296           | 123315         | reverse   | TCCATTTTCCCTTTCCCTTCC   |
|                  | 148_vigna_templ+         | 122809           | 122828         | forward   | GCTTTGTACAGCCCGAGAAC    |
|                  | 148_vigna_templ-         | 123664           | 123683         | reverse   | ACTCGGGAACATGAAGTTGG    |
| <i>Cucurbita</i> | 148_zuc_recomb+          | 882739           | 882760         | forward   | AAGCCTACGGTTGCTTAGTCAG  |
|                  | 148_zuc_recomb-          | 883212           | 883233         | reverse   | AATGAGAGAACGGCCAATTAAG  |
|                  | 148_zuc_templ+           | 882474           | 882495         | forward   | AGGGGAAGCACCTACTCCTAAC  |
|                  | 148_zuc_templ-           | 883385           | 883406         | reverse   | AAACTAAGTCGACGCGAAGAAG  |
| <i>Vigna</i>     | 639_vigna_recomb+        | 209412           | 209433         | forward   | GAGAAATAGATCGGGTTCGTGA  |
|                  | 639_vigna_recomb-        | 210259           | 210280         | reverse   | CAGTTGTCGCTTAAATGCAGAG  |
|                  | 639_vigna_templ+         | 209334           | 209355         | forward   | GTAAGGAGGCCAGACAAGAAAG  |
|                  | 639_vigna_templ-         | 210357           | 210378         | reverse   | TTGTTTGTGTAATCGCTGGT    |
| <i>Cucurbita</i> | 639_zuc_recomb+          | 840000           | 840021         | forward   | ACCAGCCTTGAAGTGAATGAAT  |
|                  | 639_zuc_recomb-          | 840786           | 840807         | reverse   | TTTCAATAGCTGCCAAAACAGA  |
|                  | 639_zuc_templ+           | 839968           | 839989         | forward   | TTGGTTGAAGATGATGTTACGC  |
|                  | 639_zuc_templ-           | 840914           | 840935         | reverse   | TCAAATAGGTCGGGAAGAAAGA  |

<sup>1</sup>Primer names with the "recomb" suffix were used to test for recombination, and primer names with the "templ" suffix were used to amplify repeat-containing regions, which served as artificial templates for PCR recombination assays
